# Supplementary material for: Organic carbon densities and accumulation rates in surface sediments of the North Sea and Skagerrak
Source: Copernicus journal article supplement (doi:10.5194/bg-18-2139-2021), 2021-03-24
Supplement: Supplementary file 1 [file bg-18-2139-2021-supplement.zip]

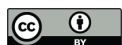

*Supplement of*

**Organic carbon densities and accumulation rates in surface sediments of the North Sea and Skagerrak**

**Markus Diesing et al.**

*Correspondence to:* Markus Diesing ([markus.diesing@ngu.no](mailto:markus.diesing@ngu.no))

- [bg-18-2139-2021-supplement-title-page.pdf](#)
- [S1-SedRates\\_v2.html](#)
- [S2-OCdensity\\_v2.html](#)
- [S3-OCAR\\_v2.html](#)
- [S4-Regionalisation\\_v2.html](#)
- [SupplementaryDataTable1.xlsx](#)
- [SupplementaryDataTable2.xlsx](#)

The copyright of individual parts of the supplement might differ from the article licence.
